# Supplementary material
Source: HighWire-hosted journal article supplement (https://www.cmaj.ca/highwire/filestream/59248/field_highwire_adjunct_files/1/poly-hsiao-2-at.pdf)

**Appendix 2 (as supplied by the authors): Trends in indicators of quality of pharmacotherapy in older adults over 10 years**

**Proportion of patients with 5+drugs from baseline over ten years; total and by age group**

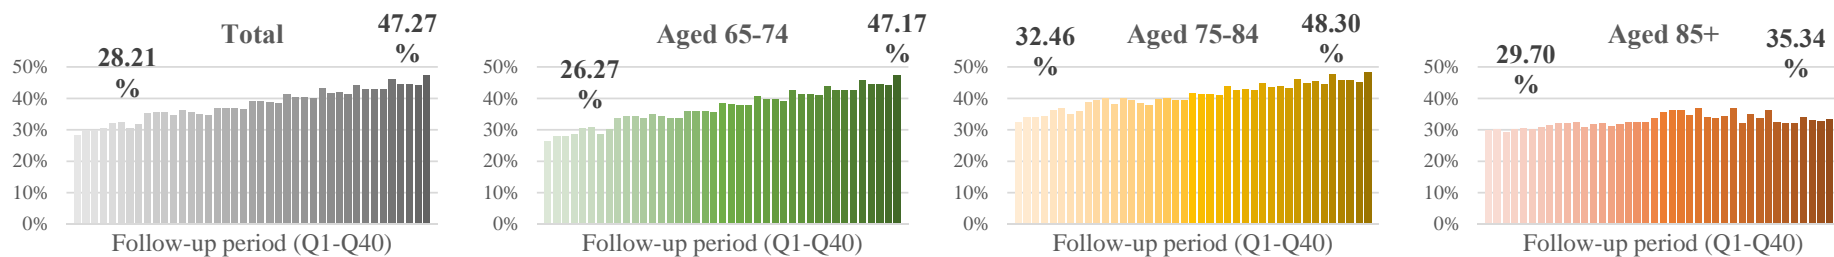

**Proportion of patients with 10+drugs from baseline over ten years; total and by age group**

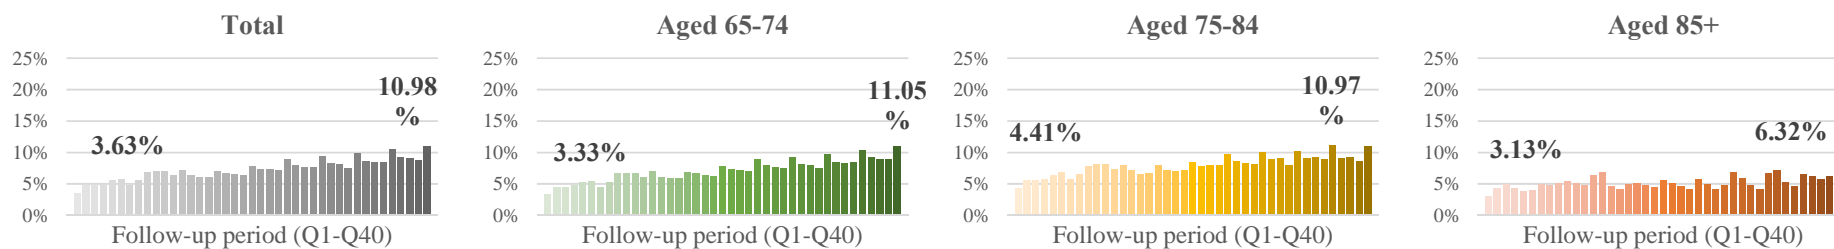

**Proportion of patients with PIMs from baseline over ten years; total and by age group**

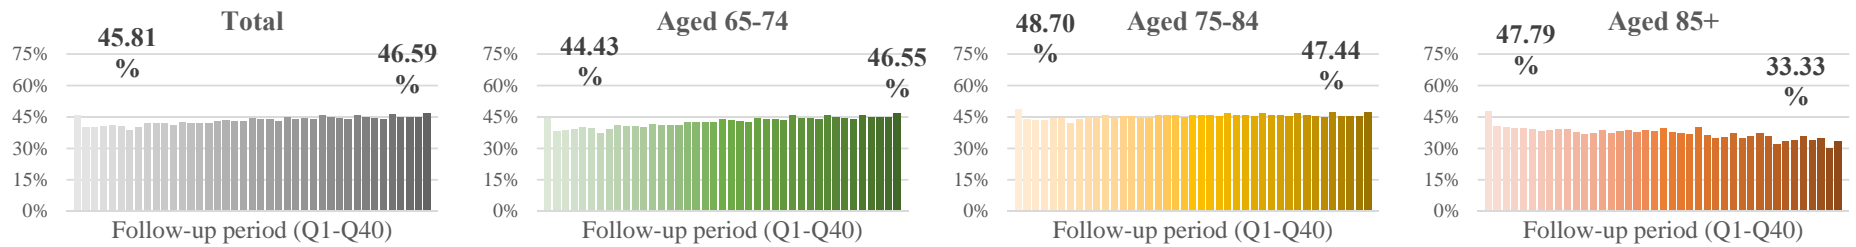

**Proportion of patients with ARS $\geq$ 1 from baseline over ten years; total and by age group**

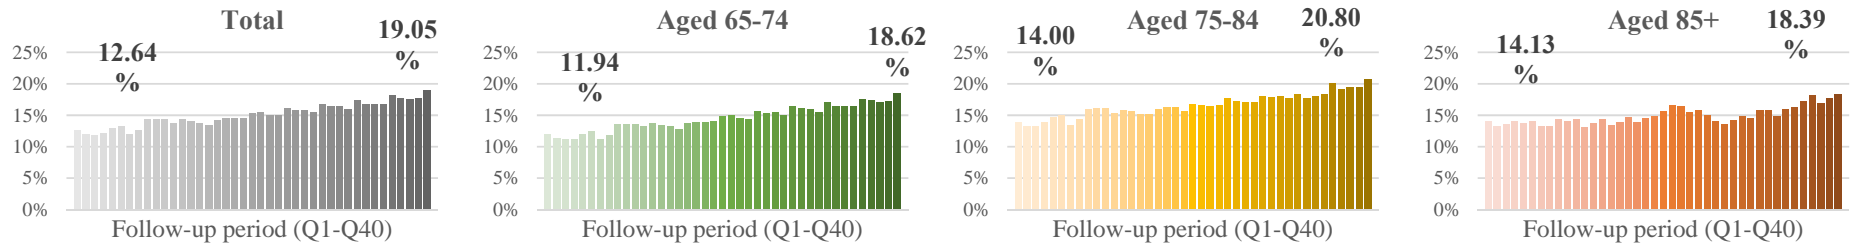

Supplement: poly-hsiao-2-at.pdf [file poly-hsiao-2-at.pdf]
